# Supplementary material for: Effective extraction of trace cytokinins in plants based on a carboxyl functionalized microporous organic network
Source: Royal Society of Chemistry journal article supplement (doi:10.1039/d5ay00123d), 2025-01-01
Supplement: d5ay00123d1.pdf [file d5ay00123d1.pdf]

## **Effective extraction of trace cytokinins in plants based on a carboxyl functionalized microporous organic network**

Li Chen,<sup>a</sup> Tao Yu,<sup>a, b</sup> Le Huang,<sup>a</sup> Qiaomei Lu,<sup>a, b, c\*</sup> Wenmin Zhang,<sup>c, d</sup> Lan Zhang

<sup>c\*</sup>

*(a. College of Biological Science and Engineering, Fujian Key Laboratory of Medical Instrument and Pharmaceutical Technology, Fuzhou University, Fuzhou 350116, China;*

*b. Fujian College Association Instrumental Analysis Center of Fuzhou University, Fuzhou 350116, China;*

*c. Key Laboratory for Analytical Science of Food Safety and Biology (Ministry of Education), College of Chemistry, Fuzhou University, Fuzhou 350116, China;*

*d. Department of Chemistry and Biotechnology, Minjiang Teachers College, Fuzhou 350108, China)*

*Corresponding author: Qiaomei Lu (luqm@fzu.edu.cn), Lan Zhang (zlan@fzu.edu.cn).*

**Table S1.** The procedure of gradient elution

| Time (min) | A (%) | B (%) | Flow rate ( $\mu\text{L min}^{-1}$ ) |
|------------|-------|-------|--------------------------------------|
| 0.0        | 90.0  | 10.0  | 200.0                                |
| 2.5        | 20.0  | 80.0  | 200.0                                |
| 3.0        | 20.0  | 80.0  | 200.0                                |
| 3.5        | 90.0  | 10.0  | 200.0                                |
| 5.0        | 90.0  | 10.0  | 200.0                                |

**Table S2.** Auto-tuned mass spectrometric parameters of CKs

|          | Qualitative | Quantitative | SRM         | Declustering  | Entrance      | Cell exit     |
|----------|-------------|--------------|-------------|---------------|---------------|---------------|
| Analytes | ion         | ion          | collision   | potential (V) | potential (V) | potential (V) |
|          | (m/z)       | (m/z)        | energy (eV) |               |               |               |
| IP       | 204.034     | 135.973      | 20          | 75            | 37            | 20            |
| KT       | 216.006     | 81.011       | 26          | 73            | 37            | 1             |
| DHZ      | 222.054     | 135.978      | 27          | 85            | 58            | 0             |
| BA       | 226.014     | 91.006       | 29          | 84            | 41            | 5             |

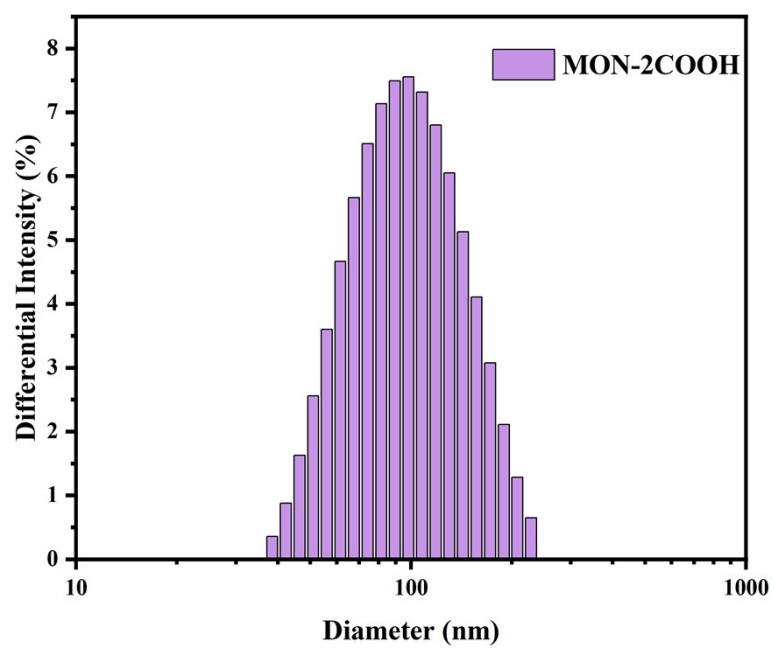

**Figure S1.** Particle size distribution analysis of MON-2COOH

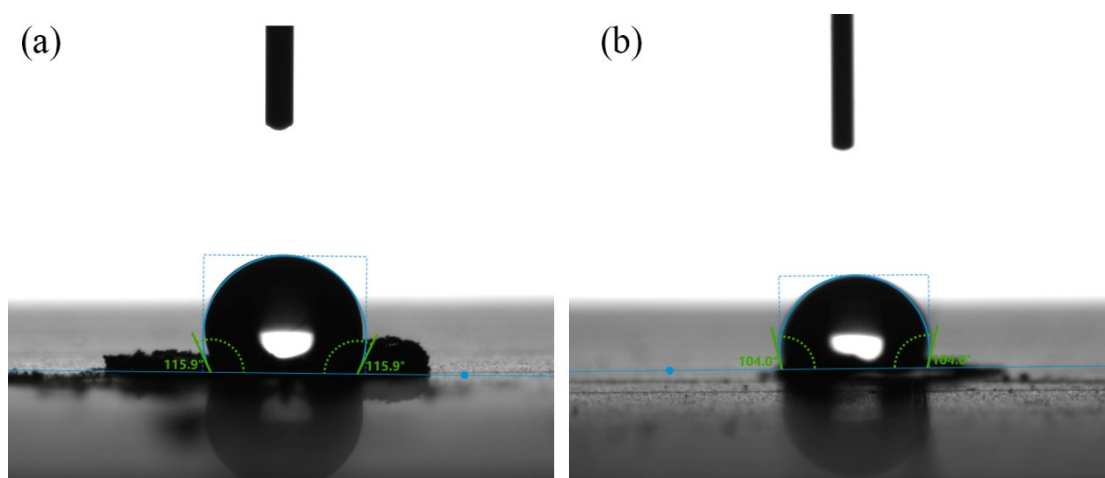

**Figure S2.** Water contact angle of the synthesized MON(a) and MON-2COOH(b).

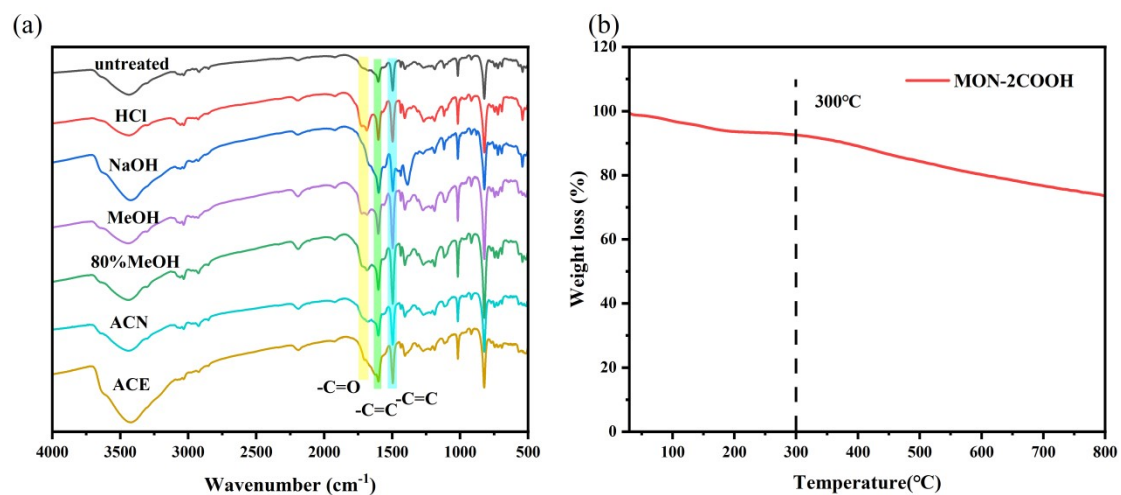

**Figure S3.** (a) FT-IR spectra after soaking MON-2COOH in different solvents for 48 h, (b) TGA curve of MON-2COOH

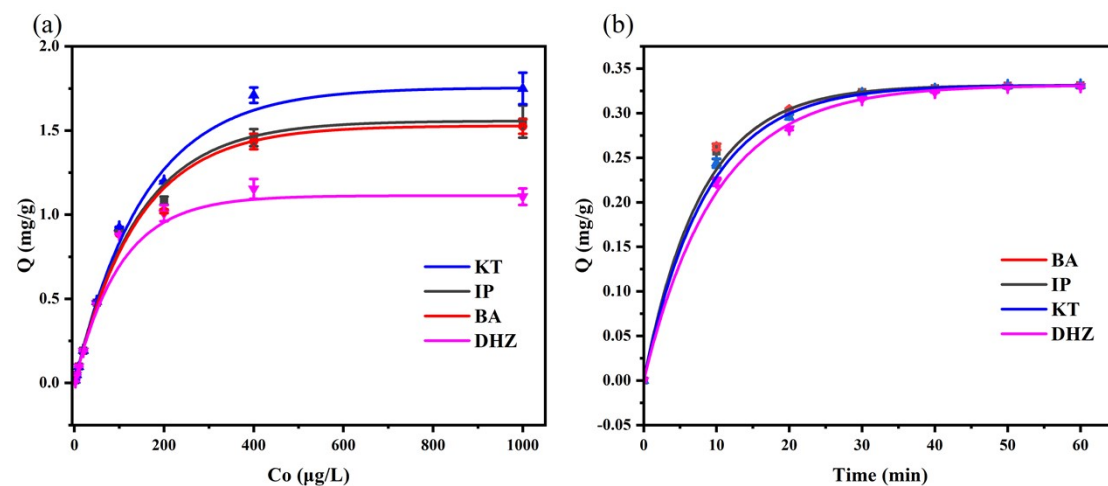

**Figure S4.** Adsorption thermodynamics of MON-2COOH

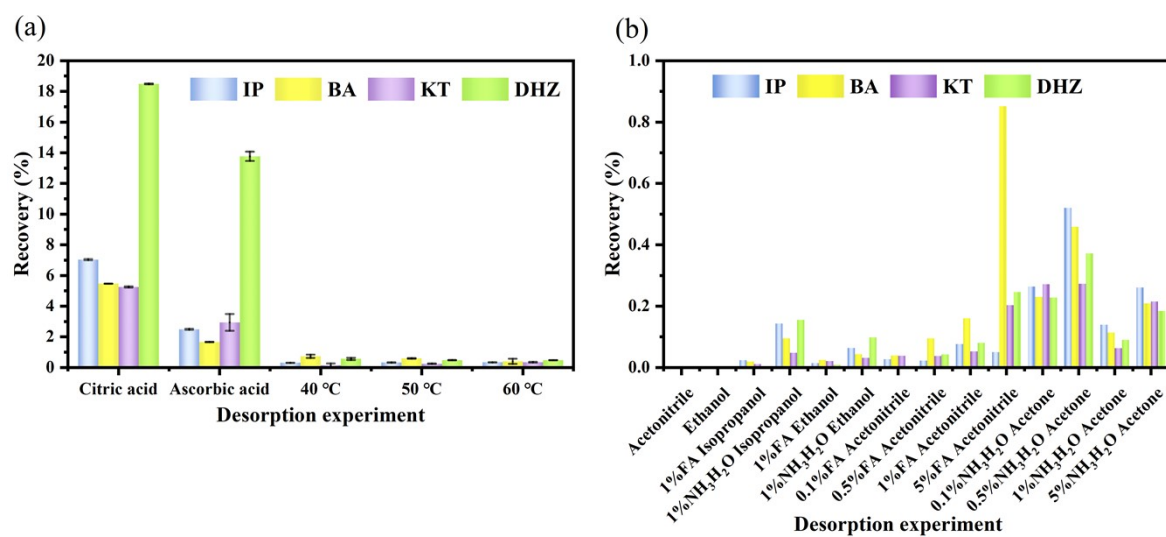

**Figure S5.** Effects of different desorption agents on recovery

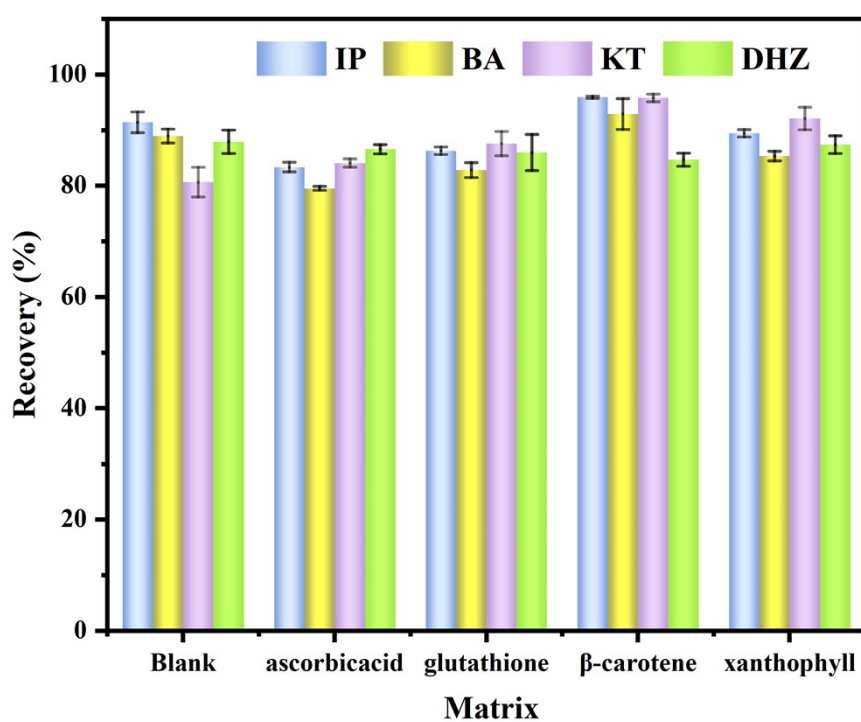

**Figure S6.** Anti-interference experiment
